# Supplementary material for: Hyaluronic Acid Hydrogel Containing Resveratrol-Loaded Chitosan Nanoparticles as an Adjuvant in Atopic Dermatitis Treatment
Source: MDPI journal article supplement (doi:10.3390/jfb14020082), 2023-01-31
Supplement: s1 [file s1]

## Supplementary Data

# Hyaluronic acid hydrogel containing resveratrol-loaded chitosan nanoparticles as an adjuvant in atopic dermatitis treatment

Raffaele Conte<sup>1#</sup>, Ilenia De Luca<sup>2#</sup>, Anna Valentino<sup>2</sup>, Pierfrancesco Cerruti<sup>3</sup>, Parisa Pedram<sup>4</sup>, Gustavo Cabrera-Barjas<sup>5</sup>, Arash Moeini<sup>4,\*</sup> and Anna Calarco<sup>2,\*</sup>

1 AMES Group Polydiagnostic Center, via Padre Carmine Fico, 24, 80013 Casalnuovo di Naples, Italy

2 Research Institute on Terrestrial Ecosystems (IRET)—CNR, Via Pietro Castellino 111, 80131 Naples, Italy

3 Institute of Polymers, Composites and Biomaterials (IPCB) – CNR, Via Campi Flegrei, 34, 80078 Pozzuoli NA, Italy

4 Technische Universität München (TUM) School of Life Sciences Lehrstuhl für Brau- und Getränketechnologie, 85354 Freising, Germany

5 Universidad de Concepción, Unidad de Desarrollo Tecnológico, UDT, Avda. Cordillera No. 2634, Parque Industrial Coronel, Coronel, Chile

\* Correspondence: arash.moeini@tum.de (A.M.); anna.calarco@cnr.it (A.C.)

# These authors contributed equally to this work.

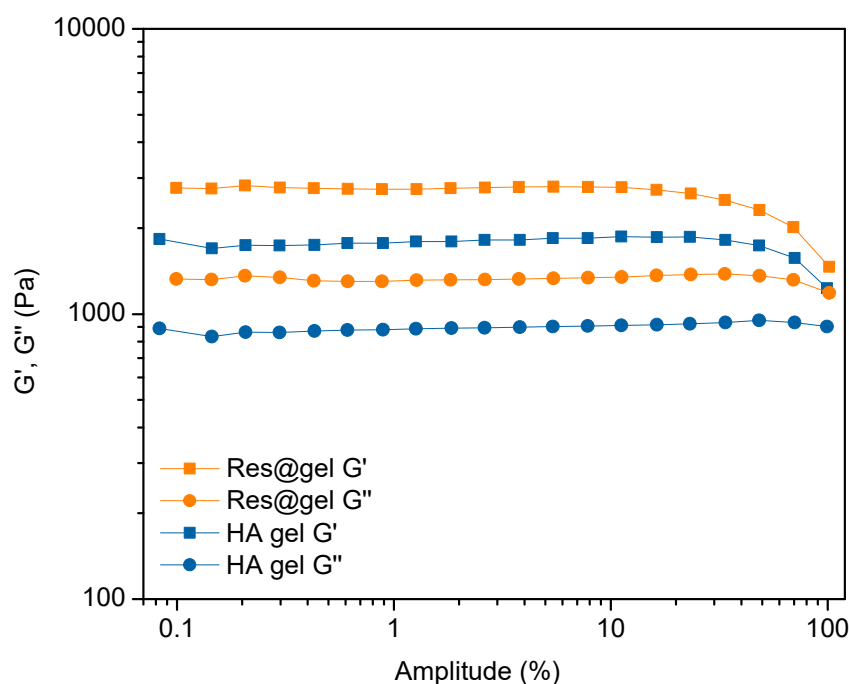

Figure S1. Dependence of viscoelastic moduli on the angular strain.

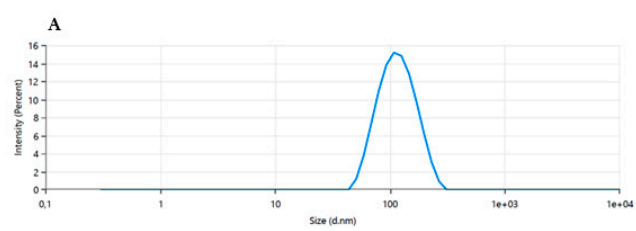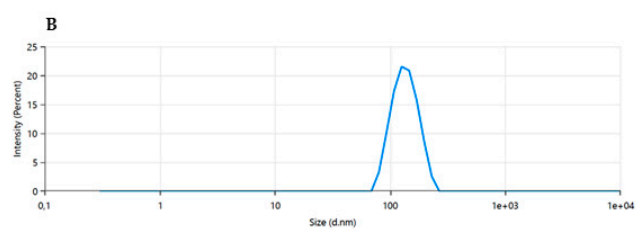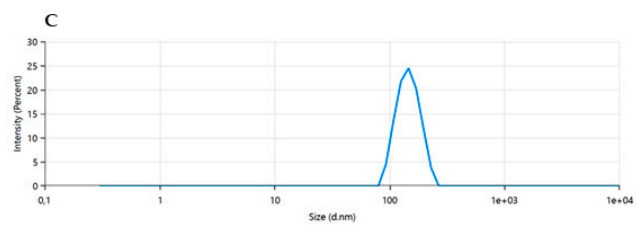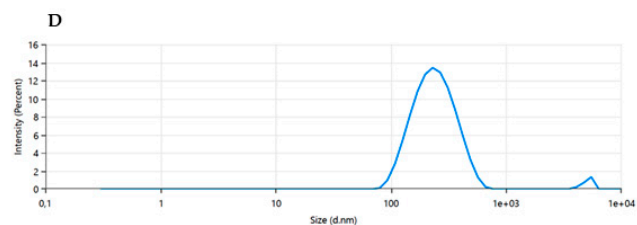

**Figure S2.** Particles PDI.
